# Supplementary material for: The PIT-trap—A “model-free” bootstrap procedure for inference about regression models with discrete, multivariate responses
Source: PubMed Central journal article supplement (PMC5524334; doi:10.1371/journal.pone.0181790), 2017-07-24
Supplement: pone.0181790.s001.pdf [file pone.0181790.s001.pdf]

# The PIT-trap – a general bootstrap procedure for inference about regression models with non-normal response

David I. Warton, Loic Thibaut and Yi A. Wang

## S1 FILE. PROOFS OF THEOREMS

We will first prove two lemmas relating to the situation where the cumulative distribution used for the PIT-trap has been misspecified, but in such a way that PIT-residuals remain identically distributed.

**Lemma 1.** *Let  $U = F(Y)Q + F(Y^-)(1 - Q)$  be the probability integral transform but where the cumulative distribution  $F(y)$  may have been misspecified, and the true distribution function is  $G(y) = h\{F(y)\}$  for some function  $h(\cdot)$ .*

*Then*

$$P(U \leq u) = h(u)$$

*Proof.* For simplicity we will consider the continuous case only, the proof follows via a similar method in the discrete case. Let  $u = F(y)$  be the observed value of the probability integral transform residual. Then:

$$P(U \leq u) = P\{F(Y) \leq F(y)\} = P(Y \leq y) = G(y) = h\{F(y)\} = h(u)$$

□

Lemma 1 is used directly in the proof of Lemma 2 below.

**Lemma 2.** *Consider a set of  $n$  random variables  $Y_1, \dots, Y_n$  with distribution function  $G_i(y)$  for  $Y_i$ . A PIT-trap sample  $Y_1^*, \dots, Y_n^*$  is computed using a (possibly misspecified) set of cumulative distributions, denoted  $F_i(y)$  for  $Y_i$ .*

If  $G_i(y) = h\{F_i(y)\}$  for some function  $h(\cdot)$ , then for each  $i$ :

$$P_*(Y_i^* \leq y) = G_i(y)$$

*Proof.*

$$\begin{aligned} P_*(Y_i^* \leq y) &= P_*\{F_i(Y_i^*) \leq F_i(y)\} = P_*\{U_i^* \leq F_i(y)\} \\ &= \sum_{i=1}^n \frac{1}{n} P\{U_i \leq F_i(y)\} \end{aligned}$$

since the bootstrap sample  $U_i^*$  is drawn at random with replacement from the set of observed PIT-residuals.

$$\begin{aligned} &= h\{F_i(y)\} \quad \text{from Lemma 1} \\ &= G_i(y) \end{aligned}$$

□

Lemma 2 shows that if probability integral transform residuals are identically distributed, then the  $Y_i^*$  preserve the marginal distribution of the  $Y_i$ .

## Proof of Theorem 1

We will prove Theorem 1 by showing that asymptotically, the conditions of Lemma 2 are satisfied.

First note that if  $\widehat{\boldsymbol{\theta}}$  is  $\sqrt{n}$ -consistent for  $\boldsymbol{\theta}$  then provided that  $F_j(y; \widehat{\boldsymbol{\theta}}, \mathbf{x}_i)$  is twice differentiable with respect to  $\boldsymbol{\theta}$  then  $F_j(y; \widehat{\boldsymbol{\theta}}, \mathbf{x}_i) = F_j(y; \boldsymbol{\theta}, \mathbf{x}_i) + O_p(n^{-1/2})$ .

Hence, up to a term  $O_p(n^{-1/2})$ ,  $F_j(y; \widehat{\boldsymbol{\theta}}, \mathbf{x}_i)$  satisfies the conditions of Lemma 2 (where  $h(\cdot)$  is the identity function). By Lemma 2, PIT-trap values follow the true cumulative distribution function  $F_j(y; \boldsymbol{\theta}, \mathbf{x}_i)$ , up to a term no larger than  $O(n^{-1/2})$ .

□

*Note:* While this argument uses the result that the  $F_j(y; \widehat{\boldsymbol{\theta}}, \mathbf{x}_i)$  approximate the true distribution  $F_j(y; \boldsymbol{\theta}, \mathbf{x}_i)$ , we can relax this assumption along the lines of Lemma 1 such that there is only the requirement that the PIT-residuals are (asymptotically) identically distributed,  $P(U_{ij} \leq u) = h(u)$  for each  $(i, j)$ . Thus the PIT-trap can preserve the marginal distribution of the data under certain forms of model misspecification.

### Proof of Theorem 3

The proof follows via the usual Edgeworth expansion approach in ?.

If  $T = g(\mathbf{Y})$  admits an Edgeworth expansion then:

$$P(T \leq t) = \Phi(t) + n^{-1/2}p_1(t)\phi(t) + n^{-1}p_2(t)\phi(t) + O(n^{-3/2})$$

where  $p_1(t)$  is an odd polynomial function of the skewness of  $T$ ,  $p_2(t)$  is an even polynomial function of the skewness and kurtosis of  $T$ , and these moments are evaluated with respect to the distribution of the matrix of data  $\mathbf{y}$ , which is characterized by its margins  $F(y; \boldsymbol{\theta}, \mathbf{x}_i)$ , and the correlation between PIT-residuals  $\text{var}(\mathbf{U}_i) = \boldsymbol{\Sigma}$ .

If  $Y$  is discrete then the same type of expansion applies, but only at continuity-corrected points and not at all  $t$  (?).

Under the same assumptions, the distribution of the PIT-trap statistic  $T^* = g(\mathbf{Y}^*)$  under resampling admits a similar Edgeworth expansion:

$$P_*(T^* \leq t) = \Phi(t) + n^{-1/2}\hat{p}_1(t)\phi(t) + n^{-1}\hat{p}_2(t)\phi(t) + O_p(n^{-3/2})$$

where  $\hat{p}_1(t)$  and  $\hat{p}_2(t)$  are evaluated with respect to PIT-trapped data  $\mathbf{Y}^*$  whose marginal distribution is  $F(y; \widehat{\boldsymbol{\theta}}, \mathbf{x}_i)$ , where the correlation between PIT-trapped residuals is  $\text{var}_*(\mathbf{U}_i) = \widehat{\boldsymbol{\Sigma}}$ .

Now from Theorem 1, the cumulative distribution function of a PIT-trap value  $Y_{ij}^*$  is  $F(y; \boldsymbol{\theta}_j, \mathbf{x}_i) + O_p(n^{-1/2})$ , and from Theorem 1,  $\text{var}(\mathbf{U}_i^*) = \widehat{\boldsymbol{\Sigma}}$  whose entries differ from

those of  $\Sigma$  by  $O_p(n^{-1/2})$ . Since  $F(y; \boldsymbol{\theta}_j, \mathbf{x}_i)$  and  $\Sigma$  characterize the joint distribution of the  $\mathbf{Y}_i$ ,

$$\hat{p}_k(t) = p_k(t) + O_p(n^{-1/2})$$

for any  $k$  for which the  $k$ th moment of  $Y_{ij}$  is defined.

Hence the coefficients of  $n^{-1/2}$  in the above two Edgeworth expansions match to first order and

$$P_*(T^* \leq t) = P(T \leq t) + O_p(n^{-1})$$

As in ?,  $\hat{p}_k(t)$  and  $p_k(t)$  are odd functions for odd  $k$ . Hence the odd terms cancel when calculating a two-tailed probability, removing the coefficient of  $n^{-1/2}$  in each expansion, and the coefficients of  $n^{-1}$  match to first order, so

$$P_*(-t \leq T^* \leq t) = P(-t \leq T \leq t) + O_p(n^{-3/2})$$

## References

- Hall, P. (1992). *The bootstrap and Edgeworth expansion*. Springer-Verlag, New York.
- Kolassa, J. E. and McCullagh, P. (1990). Edgeworth series for lattice distributions. *The Annals of Statistics*, 18(2):981–985.
